# Supplementary material for: Regorafenib combined with PD1 blockade increases CD8 T-cell infiltration by inducing CXCL10 expression in hepatocellular carcinoma
Source: PubMed Central journal article supplement (PMC7689089; doi:10.1136/jitc-2020-001435), 2020-11-24

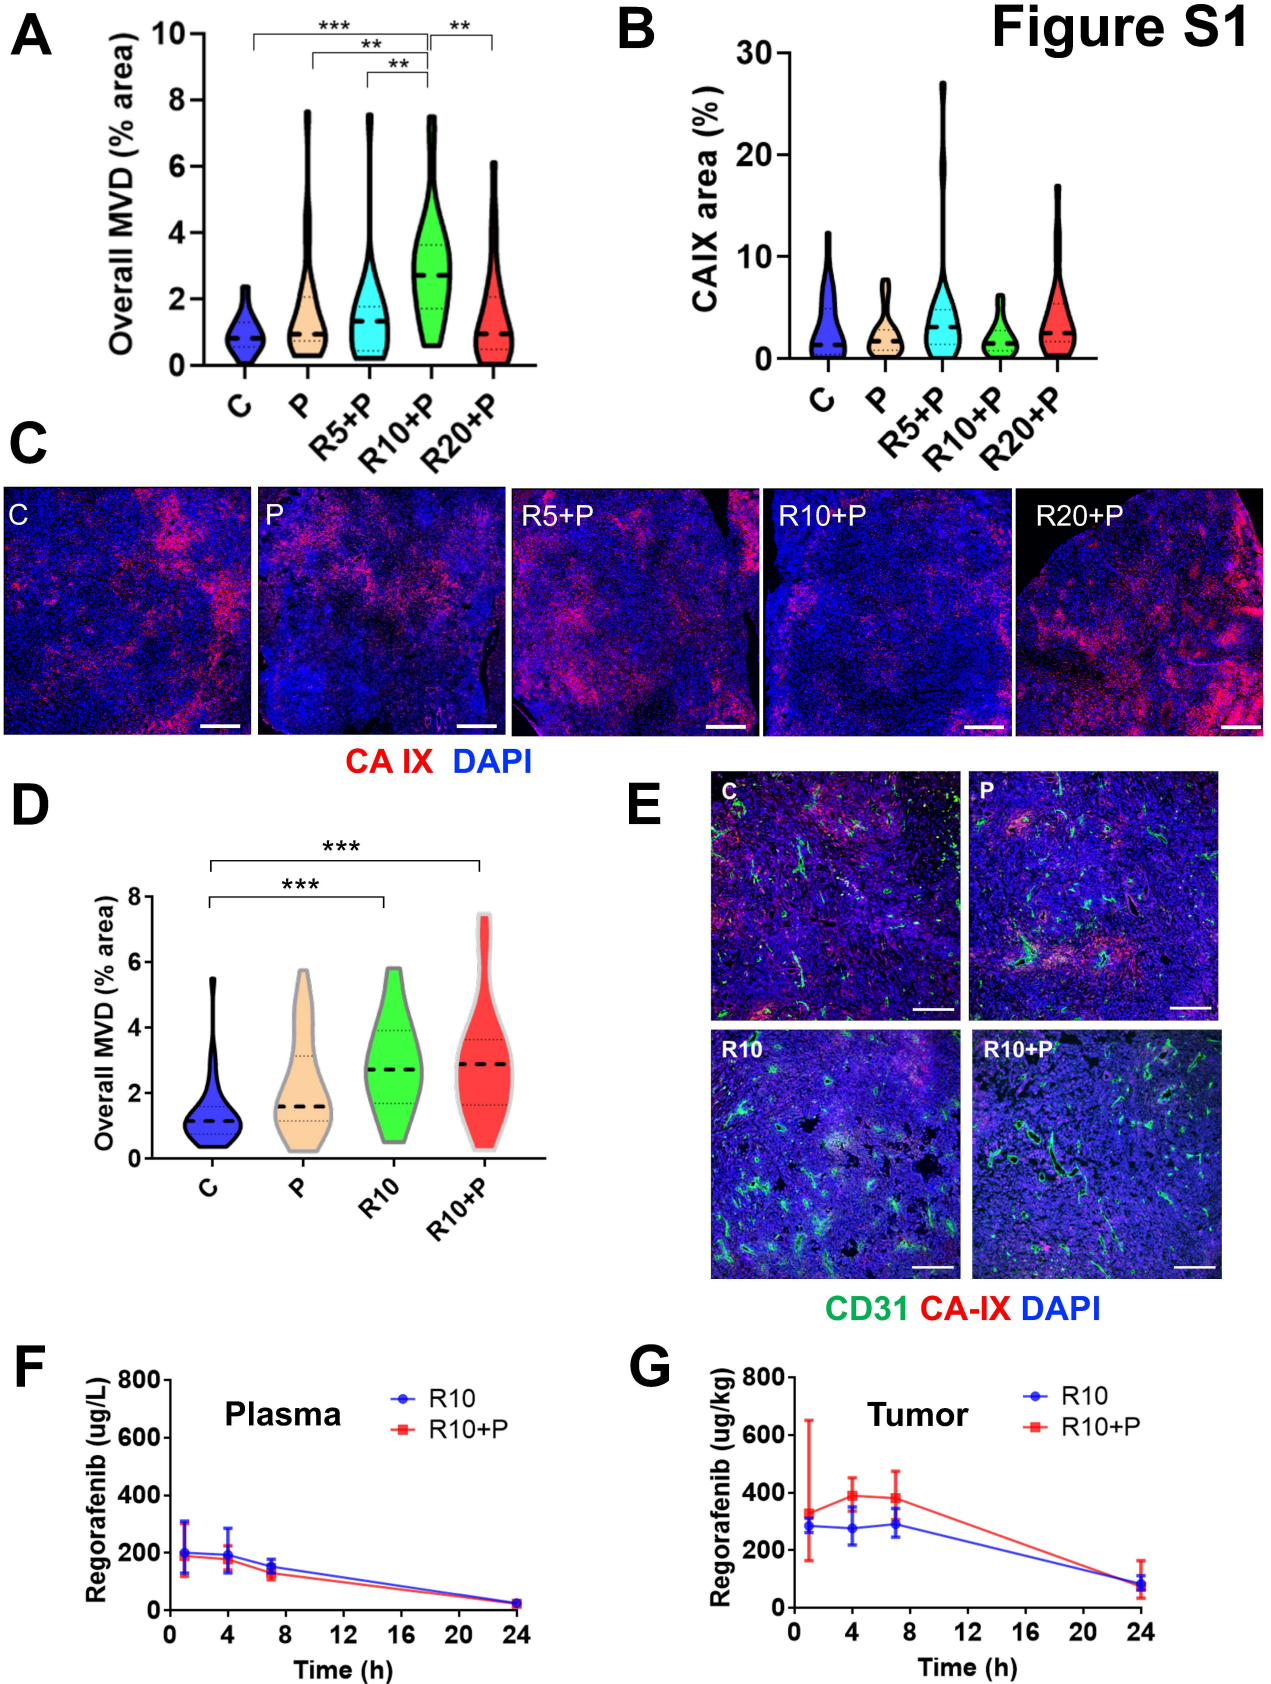

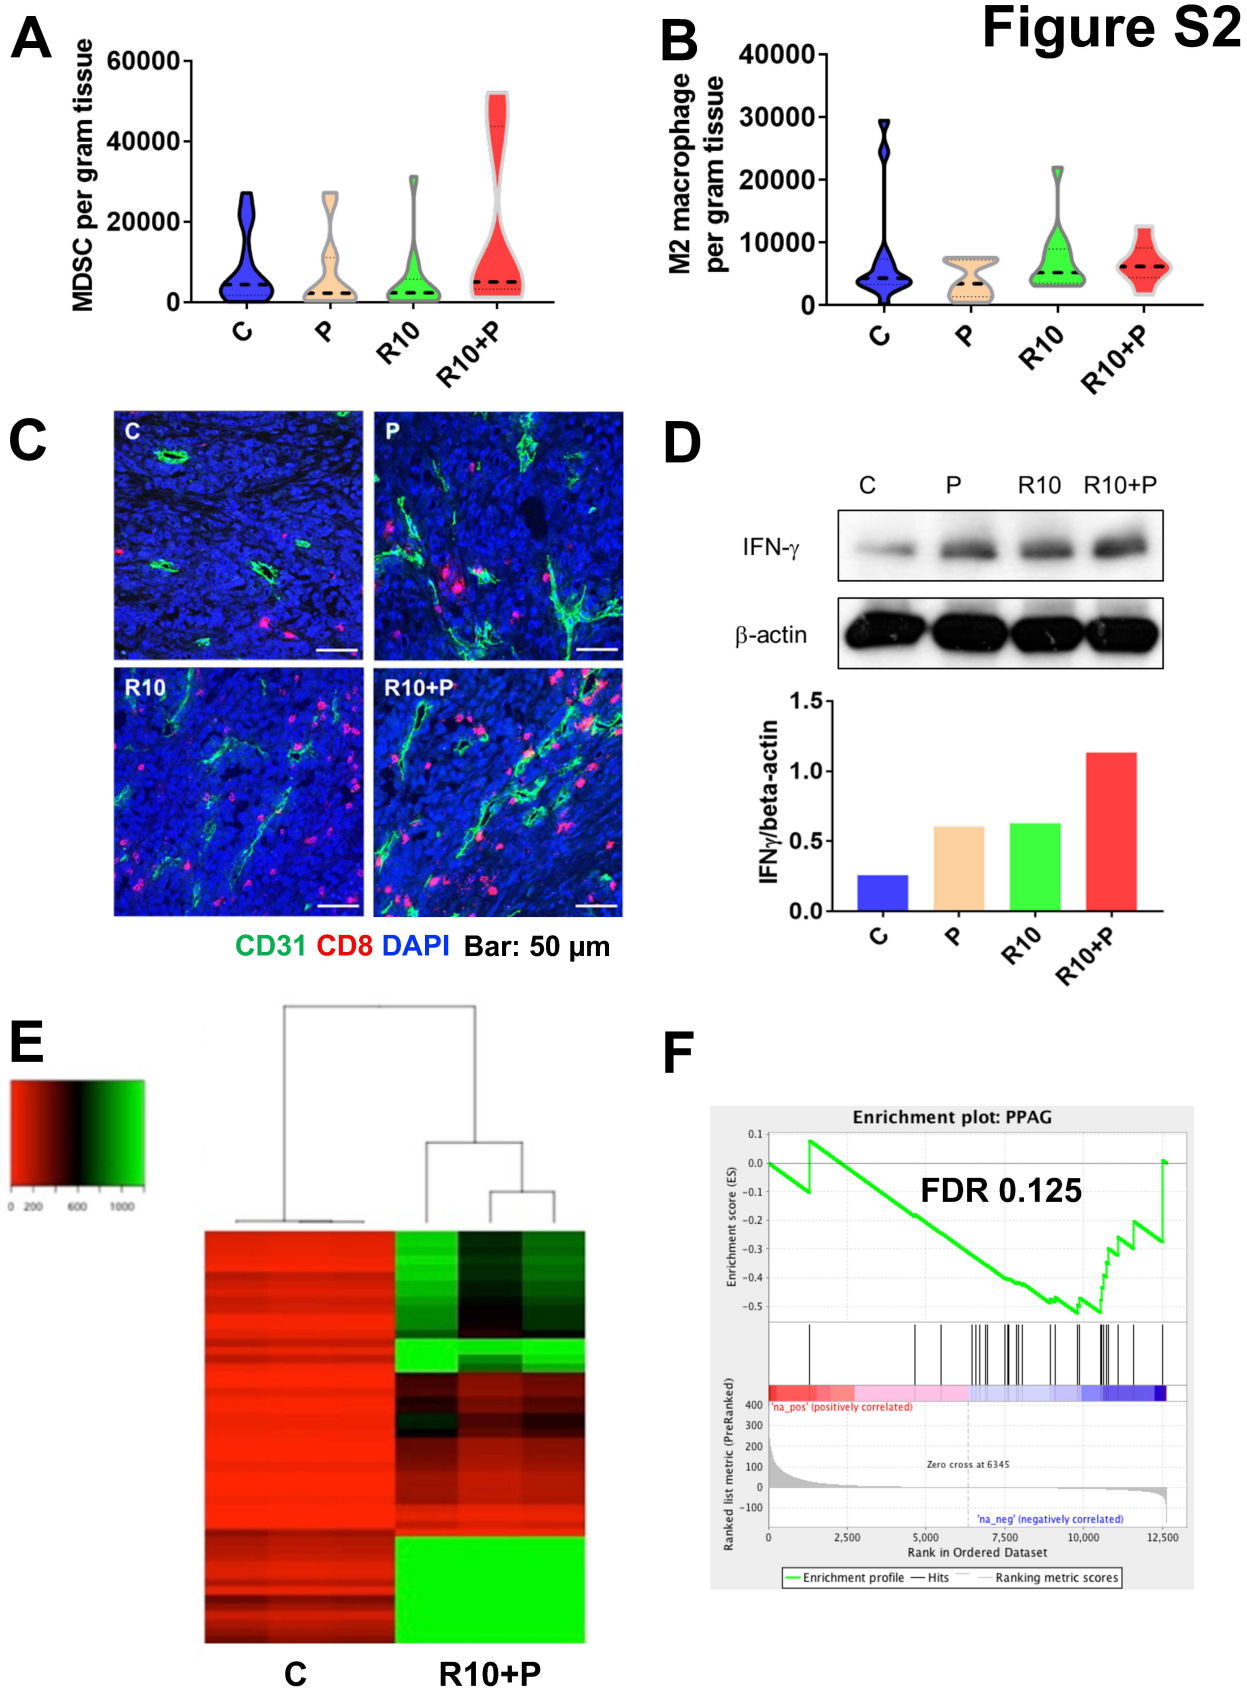

## Figure S3

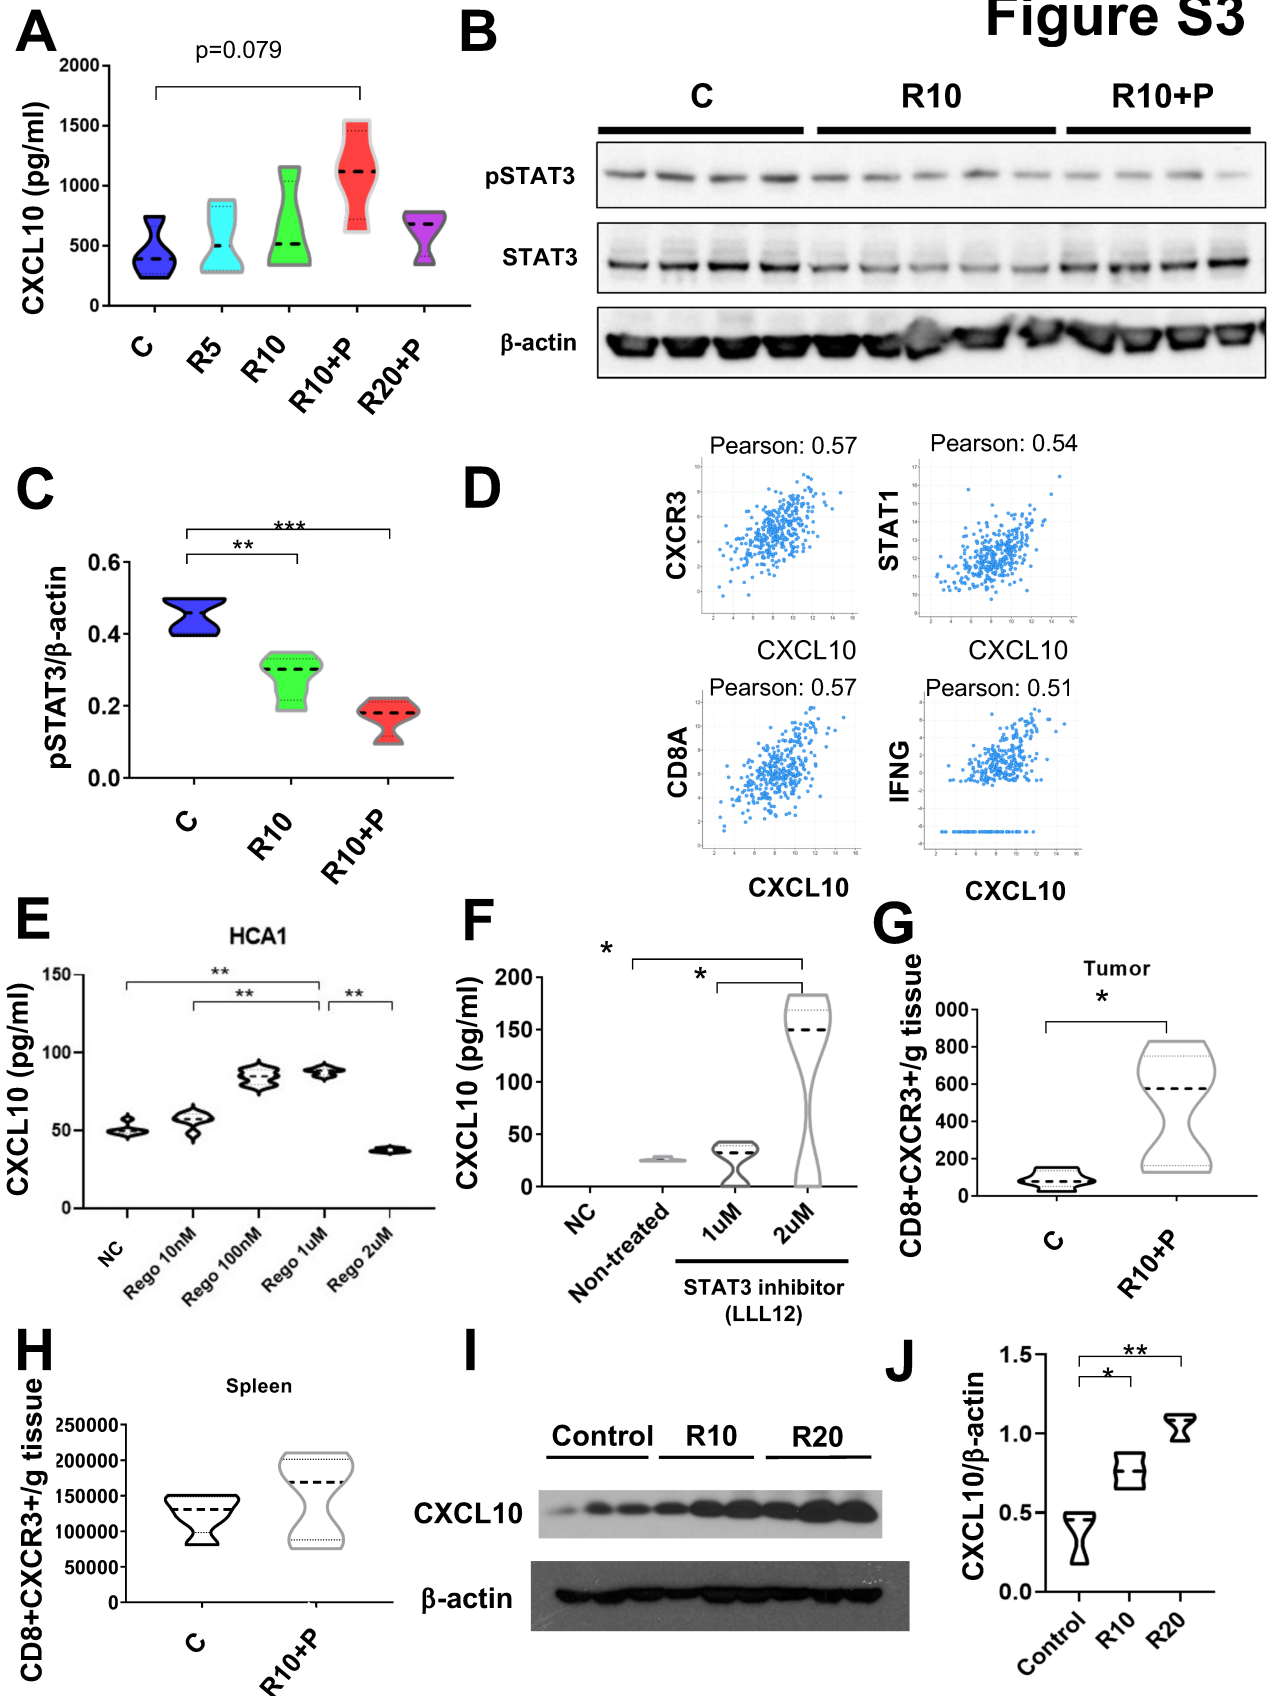

# Figure S4

**A**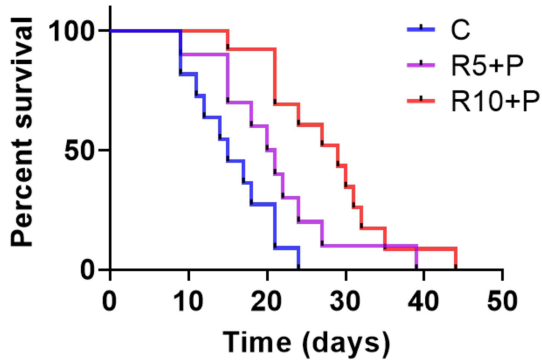**B**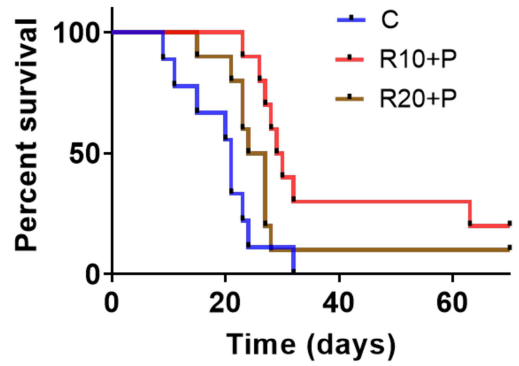**C**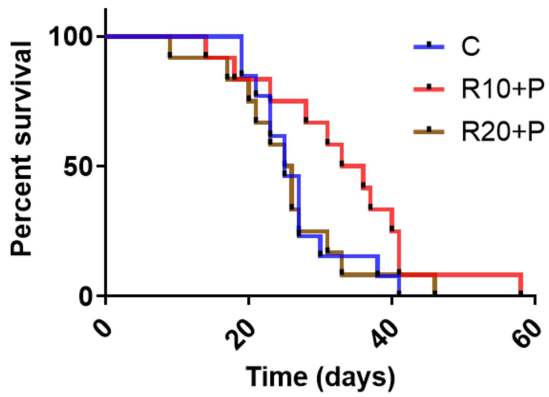**D**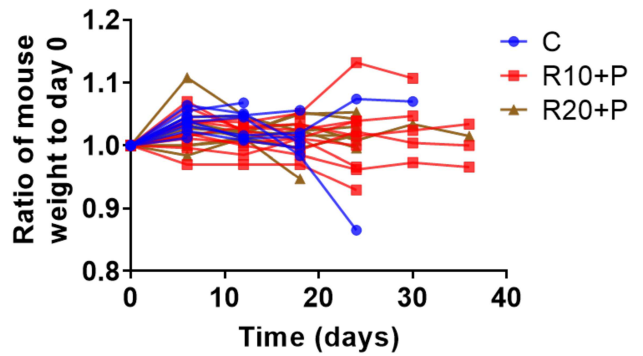

Supplement: jitc-2020-001435supp002.pdf [file jitc-2020-001435supp002.pdf]
